# Supplementary material for: Pretreatment TACC3 expression in locally advanced rectal cancer decreases the response to neoadjuvant chemoradiotherapy
Source: publisher site journal article supplement (doi:10.18632/aging.101585), 2018-10-19
Supplement: Supplementary file [file aging-v10i10-101585-supplementary-material-SD1.pdf]

SUPPLEMENTARY MATERIAL

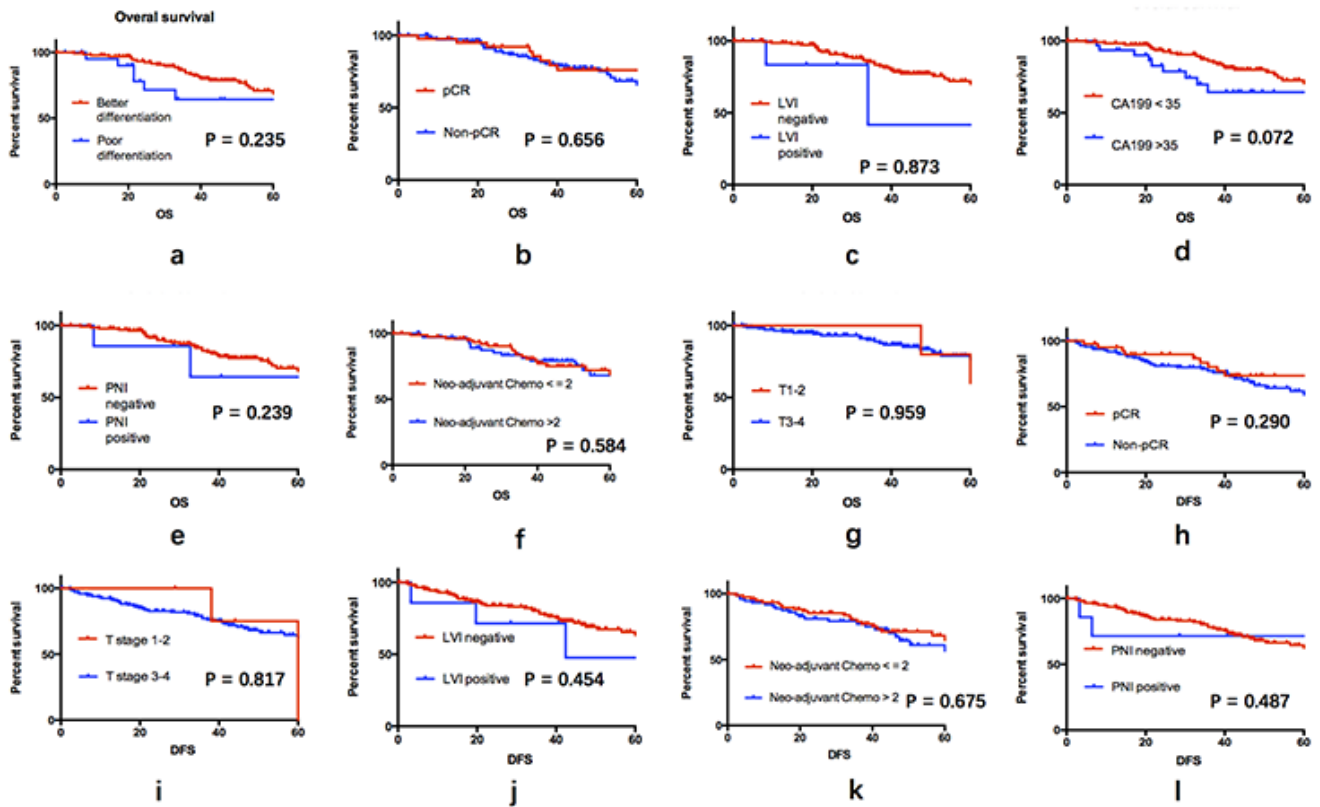

**Supplementary Figure S1. Effects of clinical variables not shown in Figure 4 on 5-year overall and disease-free survival rates. (A-D)** Five-year overall survival rate among the 152 rectal cancer patients, taking into account tumor differentiation, pCR status, LVI status, and the CA19-9 level. **(E-L)** Five-year disease-free survival rate among the 152 rectal cancer patients, taking into account PNI status, neoadjuvant chemotherapy cycles, T stage, pCR status, T stage, LVI status, number of neoadjuvant chemotherapy cycles, and PNI status.
